# Supplementary material for: Computational Metabolomics Tools Reveal Metabolic Reconfigurations Underlying the Effects of Biostimulant Seaweed Extracts on Maize Plants under Drought Stress Conditions
Source: MDPI journal article supplement (doi:10.3390/metabo12060487), 2022-05-27
Supplement: s1 [file s1]

## Supplementary File

### Computational metabolomics tools reveal metabolic reconfigurations underlying the effects of biostimulant seaweed extracts on maize plants under drought stress conditions

Morena M. Tinte<sup>1</sup>, Keabetswe Masike<sup>1</sup>, Paul A. Steenkamp<sup>1</sup>, Johan Huyser<sup>2</sup>, Justin J.J. van der Hooft<sup>3\*</sup> and Fidele Tugizimana<sup>1,2\*</sup>

#### Section S3.1: Determination of Plant available water (PAW)

The soil field capacity (FC) and permanent wilting point (PWP) were determined in the following manner. A pot was filled with soil and flooded with water. The pot was then sealed on top with cling wrap and the water was left to drain at the bottom of the pot for 3 days. The wet soil was then weighed and the mass was regarded as the FC. Thereafter, the soil was dried in an oven at 50°C and weighed, the mass was considered as the PWP. The plant available water (PAW) was then determined as follows:

- (i)  $PAW = FC - PWP$
- (ii)  $90\% \text{ PAW} = (PAW \times 0.9) + PWP$
- (iii)  $50\% \text{ PAW} = (PAW \times 0.5) + PWP$

#### GNPS Results

GNPS job links:

1. Negative electrospray ionization mode:

FBMN: <https://gnps.ucsd.edu/ProteoSAFe/status.jsp?task=9a78bc6fc12648b6b6a0917990748f1f>

MS2LDA:

<https://proteomics2.ucsd.edu/ProteoSAFe/status.jsp?task=da6156bee08947b2b3b6e100ce918aa9>

NAP: <https://proteomics2.ucsd.edu/ProteoSAFe/status.jsp?task=af3fcc8836b446bfa9772d1e69b54dce>

MolNetEnhancer:

<https://gnps.ucsd.edu/ProteoSAFe/status.jsp?task=6430f5896eab45d2b40819a52e008e54>

2. Positive electrospray ionization mode:

FBMN: <https://gnps.ucsd.edu/ProteoSAFe/status.jsp?task=3acba582a78a40dd8618d9cfc1c0ea16>

MS2LDA:

<https://proteomics2.ucsd.edu/ProteoSAFe/status.jsp?task=6a1178a2a5c74127880679fca96f31a1>

NAP: <https://proteomics2.ucsd.edu/ProteoSAFe/status.jsp?task=9df38400bd244088a406a1a476901a50>

MolNetEnhancer:

<https://gnps.ucsd.edu/ProteoSAFe/status.jsp?task=6500bf69794e4fdf91532f97e1a8328e>

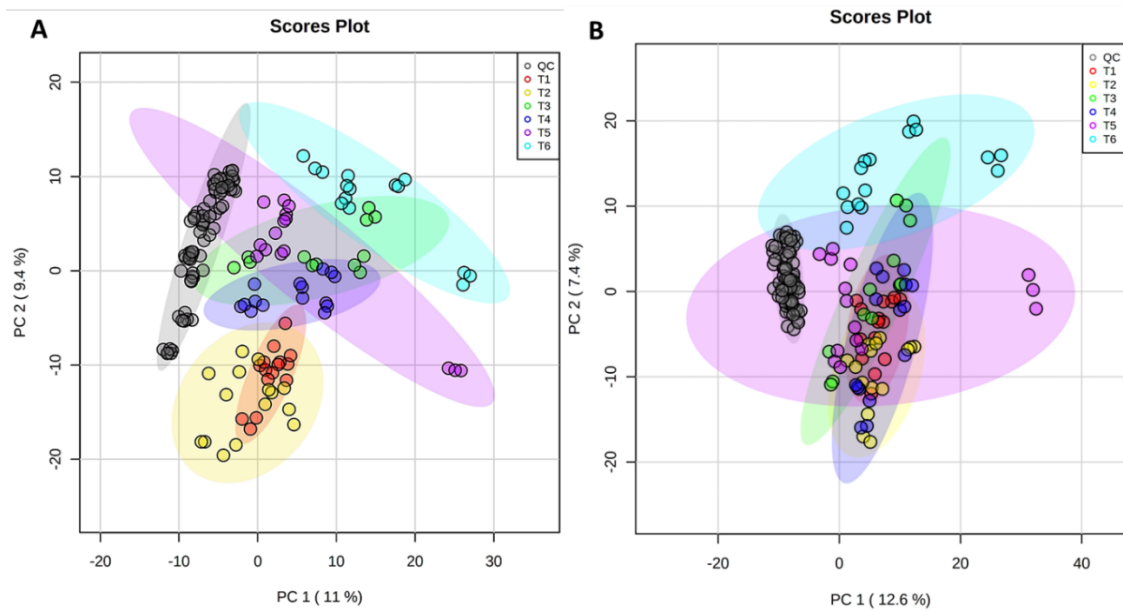

**Figure S1.** Principal component analyses (PCA) score plots for (A) electrospray ionisation (ESI) positive (ESI<sup>+</sup>) data that explains 42.7% variation in pareto-scaled data with 2.6% predictive variation, and (B) ESI negative (ESI<sup>-</sup>) data explaining 41.3% variation in pareto-scaled data with 2.2% predictive variation. The sample groupings are coloured according to stress conditions, biostimulant treatment and method of application (QC = black; T1 = red; T2 = yellow; T3 = green; T4 = blue; T5 = purple; and T6 = cyan). **Abbreviations/key:** QC, quality control; T1, control 1 (no biostimulant application under normal conditions); T2, control 2 (no biostimulant application under drought stress conditions); T3, soil applied biostimulant under normal conditions; T4, soil applied biostimulant under drought stress conditions; T5, foliar applied biostimulant under normal conditions; and T6, foliar applied biostimulant under drought stress conditions.

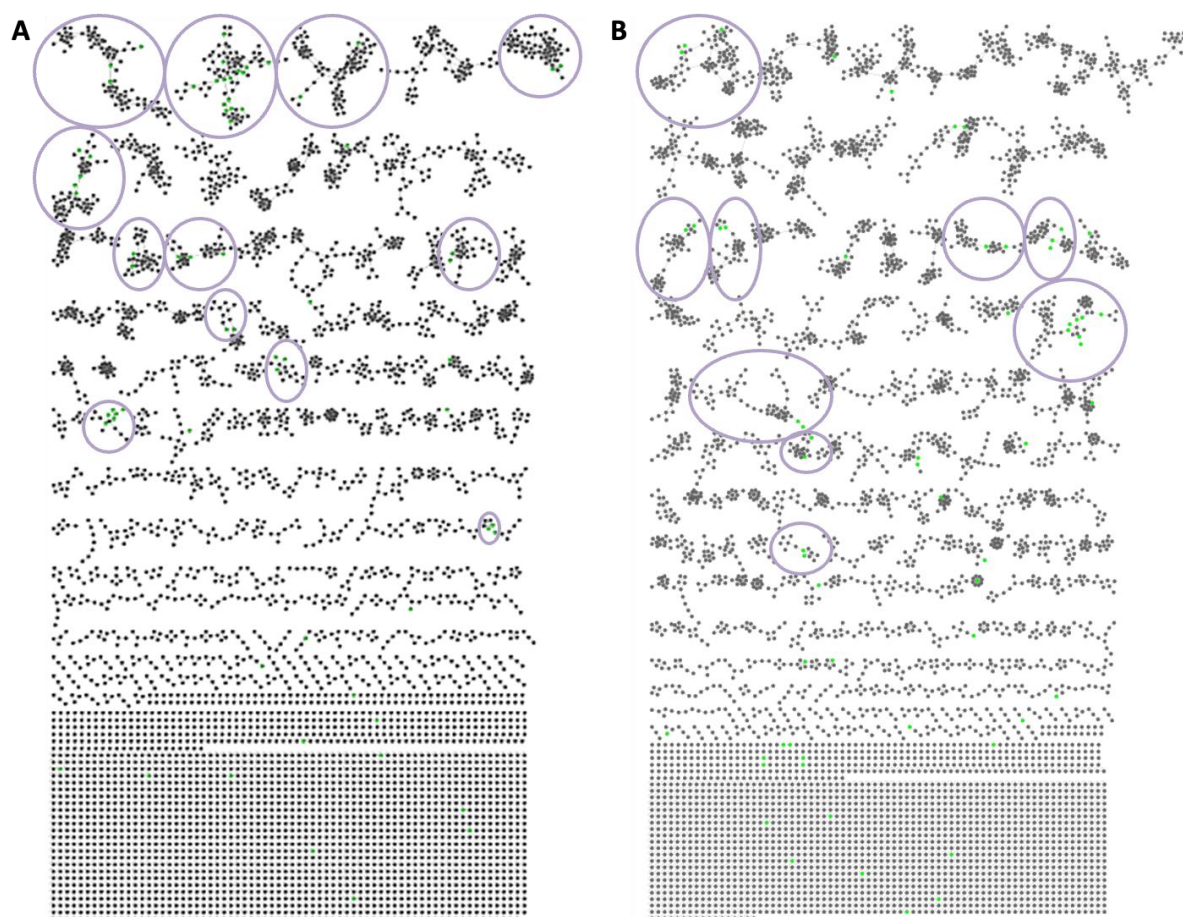

**Figure S2.** Feature-based molecular network (FBMN) of (A) positive electrospray ionisation (ESI<sup>+</sup>) and (B) negative electrospray ionisation (ESI<sup>-</sup>) MS/MS spectra obtained from maize leave extracts. The molecular networks depict structurally similar nodes as molecular families/clusters, with the nodes which mass spectra had a spectral match in the GNPS public mass spectral libraries represented by green coloured nodes and the unknowns by grey coloured nodes. The molecular families encircled have two or more annotated nodes, and these highlight the (better) known chemistry within the data.

**Table S1.** Annotation of unique metabolites based on the spectral matches of experimental data with the GNPS library databases with the conditions of a 0.7 cosine score threshold and a minimum of 6 shared mass peaks between query and library mass spectrum.

| Metabolite Annotation                                                                                                                                                            | Metabolite Abbreviation | Precursor mass ( <i>m/z</i> ) | Library mass ( <i>m/z</i> ) | Diagnostic fragments ( <i>m/z</i> ) | Score Threshold | Ionisation Mode | ClassyFire Class Annotation      | Manually assigned Chemical Class Terms |
|----------------------------------------------------------------------------------------------------------------------------------------------------------------------------------|-------------------------|-------------------------------|-----------------------------|-------------------------------------|-----------------|-----------------|----------------------------------|----------------------------------------|
| 4-aminobutanoate                                                                                                                                                                 |                         | 104.11                        | 104.11                      | 60                                  | 0.7             | Positive        | Carboxylic acids and derivatives | Amino acids and derivatives            |
| Phenethylamine                                                                                                                                                                   | PEA                     | 122.10                        | 122.10                      | 105                                 | 0.7             | Positive        | No match                         | Benzene and substituted derivatives    |
| 4-hydroxyproline                                                                                                                                                                 | Hyp                     | 132.11                        | 132.07                      | 114; 86                             | 0.7             | Positive        | No match                         | Amino acids and derivatives            |
| Adenine                                                                                                                                                                          | Ade                     | 136.06                        | 136.06                      |                                     | 0.7             | Positive        | Carboxylic acids and derivatives | Imidazopyrimidines                     |
| 1-Naphthol                                                                                                                                                                       | 1-NAP                   | 145.03                        | 145.06                      | 117; 115; 103                       | 0.7             | Positive        | Organic compounds                | Organic compounds                      |
| 2-Naphthol                                                                                                                                                                       | 2-NAP                   | 145.03                        | 145.06                      | 117                                 | 0.7             | Positive        | Organic compounds                | Organic compounds                      |
| 5,6 Dimethylbenzimidazole                                                                                                                                                        |                         | 147.04                        | 147.09                      | 132                                 | 0.7             | Positive        | Carboxylic acids and derivatives | Benzimidazoles                         |
| p-Coumaraldehyde                                                                                                                                                                 |                         | 147.05                        | 147.04                      |                                     | 0.7             | Positive        | Cinnamaldehydes                  | Cinnamaldehydes                        |
| (4S,5Z,6S)-4-(2-methoxy-2-oxoethyl)-5-[2-[(E)-3-phenylprop-2-enoyl]oxyethylidene]-6-[(2S,3R,4S,5S,6R)-3,4,5-trihydroxy-6-(hydroxymethyl)oxan-2-yl]oxy-4H-pyran-3-carboxylic acid |                         | 149.03                        | 149.06                      | 121                                 | 0.7             | Positive        | Phenols                          | Organoxygen compounds                  |
| Rosmarinic acid                                                                                                                                                                  | RosA                    | 163.04                        | 163.04                      | 145; 135; 117; 107; 89              | 0.7             | Positive        | Carboxylic acids and derivatives | Cinnamic acids and derivatives         |
| 5-Methyl-2-benzofuran-1,3-dione                                                                                                                                                  |                         | 163.05                        | 163.04                      | 135; 133                            | 0.7             | Positive        | Carboxylic acids and derivatives | Benzofurans                            |
| 4-Coumaric acid                                                                                                                                                                  | 4-CA                    | 165.06                        | 165.06                      | 147; 119; 91                        | 0.7             | Positive        | Carboxylic acids and derivatives | Cinnamic acids and derivatives         |
| Ferulic acid                                                                                                                                                                     | FA                      | 177.06                        | 177.05                      | 163; 149; 145;                      | 0.7             | Positive        | Carboxylic acids                 | Cinnamic acids and                     |

|                                                                 |                 |        |        |                                                                                            |     |          |                                  |                                  |
|-----------------------------------------------------------------|-----------------|--------|--------|--------------------------------------------------------------------------------------------|-----|----------|----------------------------------|----------------------------------|
|                                                                 |                 |        |        | 135; 117; 89                                                                               |     |          | and derivatives                  | derivatives                      |
| Caffeic acid                                                    | CA              | 181.06 | 181.04 | 163; 145; 135; 117                                                                         | 0.7 | Positive | Carboxylic acids and derivatives | Cinnamic acids and derivatives   |
| 3-Methyldiphenylamine                                           |                 | 184.08 | 184.11 |                                                                                            | 0.7 | Positive | Carboxylic acids and derivatives | Pyridines and derivatives        |
| 3,4-Methylenedioxy-N-methylamphetamine                          | MDMA            | 194.12 | 194.12 | 163; 135                                                                                   | 0.7 | Positive | Carboxylic acids and derivatives | Benzodioxoles                    |
| 3-Hydroxy-4-methoxycinnamic acid                                | Isoferulic acid | 195.07 | 195.07 | 177; 163; 149; 145; 135; 117; 89                                                           | 0.7 | Positive | Carboxylic acids and derivatives | Cinnamic acids and derivatives   |
| 3-Nitro-L-tyrosine                                              | 3-Nitrotyrosine | 225.04 | 225.05 | 181; 163; 145; 135                                                                         | 0.7 | Positive | Carboxylic acids and derivatives | Carboxylic acids and derivatives |
| Pinolenic acid                                                  | PA              | 261.22 | 261.22 | 243; 233; 219; 215; 187; 177; 173; 163; 159; 149; 145; 135; 131; 121; 109; 107; 93; 81; 67 | 0.7 | Positive | Lipids                           | Fatty Acyls                      |
| Oleamide                                                        |                 | 282.28 | 282.27 | 265; 247; 212; 184; 163; 156; 149; 135; 121                                                | 0.7 | Positive | Lipids                           | Fatty Acyls                      |
| D-erythro-C18-Sphingosine                                       | Sphingosine     | 282.29 | 282.28 | 265; 121                                                                                   | 0.7 | Positive | Lipids                           | Organonitrogen compounds         |
| Luteolin                                                        | LT              | 287.06 | 287.06 |                                                                                            | 0.7 | Positive | Flavones                         | Flavonoids                       |
| 9-hydroxy-10E,12Z,15Z-octadecatrienoic acid                     | 9-HOTrE         | 293.21 | 293.21 | 275; 171; 121                                                                              | 0.7 | Positive | Fatty Acyls                      | Fatty Acyls                      |
| 5-Hydroxy-6,7-dimethoxyflavone                                  | Mosloflavone    | 299.06 | 299.09 |                                                                                            | 0.7 | Positive | Carboxylic acids and derivatives | Isoflavonoids                    |
| Quercetin                                                       | QUE             | 303.04 | 303.05 |                                                                                            | 0.7 | Positive | Carboxylic acids and derivatives | Flavonoids                       |
| 4,4'-Methylenebis(2,6-diethylaniline)                           |                 | 311.25 | 311.25 |                                                                                            | 0.7 | Positive | Lipids                           | Organooxygen compounds           |
| 7-Hydroxycoumarin glucoside                                     | Skimmin         | 325.10 | 325.09 | 163                                                                                        | 0.7 | Positive | Carboxylic acids and derivatives | Coumarins and derivatives        |
| 4-[(E)-3-(3,4-dihydroxyphenyl)prop-2-enoyl]oxy-2,3-dihydroxy-2- |                 | 330.12 | 330.12 | 181; 163; 145; 135; 117; 107; 89                                                           | 0.7 | Positive | Cinnamic acids and derivatives   | Cinnamic acids and derivatives   |

|                                                                                                                                                                           |                       |        |        |                                                                                             |     |          |                                  |                                |
|---------------------------------------------------------------------------------------------------------------------------------------------------------------------------|-----------------------|--------|--------|---------------------------------------------------------------------------------------------|-----|----------|----------------------------------|--------------------------------|
| methylbutanoic acid                                                                                                                                                       |                       |        |        |                                                                                             |     |          |                                  |                                |
| 4',5,7-Trihydroxy-3,6-dimethoxyflavone                                                                                                                                    | 3,6-Dimethoxyapigenin | 331.07 | 331.08 | 315                                                                                         | 0.7 | Positive | Phenols                          | Flavonoids                     |
| 5,12-Dihydroxy-6,8,10,14-eicosatetraenoic acid                                                                                                                            | 5,12-DiHETE           | 335.25 | 335.22 | 317                                                                                         | 0.7 | Positive | Lipids                           | Fatty Acyls                    |
| Chlorogenic acid                                                                                                                                                          | CGA                   | 337.09 | 337.09 | 193; 181; 163; 145; 135; 117; 107; 89                                                       | 0.7 | Positive | Carboxylic acids and derivatives | Cinnamic acids and derivatives |
| Cyclohexanecarboxylic acid, 1,3,4-trihydroxy-5-[[[(2E)-3-(4-hydroxyphenyl)-1-oxo-2-propen-1-yl]oxy]-, (1R,3R,4S,5R) (3-p-Coumaroylquinic acid)                            | 3-CoQA                | 339.11 | 339.11 | 147; 119; 91                                                                                | 0.7 | Positive | Carboxylic acids and derivatives | Cinnamic acids and derivatives |
| Monolinolenin (9c,12c,15c)                                                                                                                                                |                       | 353.27 | 353.27 | 335; 279; 261; 243; 233; 205; 191; 187; 173; 163; 159; 149; 145; 133; 121; 109; 107; 95; 93 | 0.7 | Positive | Lipids                           | Fatty Acyls                    |
| Caffeoylquinic acid                                                                                                                                                       | CQA                   | 355.10 | 355.10 | 163; 145; 135; 117                                                                          | 0.7 | Positive | Carboxylic acids and derivatives | Cinnamic acids and derivatives |
| (2R)-3-(3,4-dihydroxyphenyl)-2-[(E)-3-(3,4-dihydroxyphenyl)prop-2-enoyl]oxypropanoic acid (Rosmarinic acid)                                                               | RosA                  | 361.14 | 361.10 | 145; 135; 117; 107; 89                                                                      | 0.7 | Positive | Carboxylic acids and derivatives | Cinnamic acids and derivatives |
| Cyclohexanecarboxylic acid, 1,3,5-trihydroxy-4-[[[(2E)-3-(4-hydroxy-3-methoxyphenyl)-1-oxo-2-propen-1-yl]oxy]-, (1alpha,3alpha,4alpha,5beta) (4-O-Feruloyl-D-quinic acid) | 4-O-FQA               | 369.12 | 369.12 | 177; 149; 145; 117; 89                                                                      | 0.7 | Positive | Carboxylic acids and derivatives | Cinnamic acids and derivatives |
| (1S,3R,4R,5R)-3-[(E)-3-(3,4-dihydroxyphenyl)prop-2-enoyl]oxy-1,4,5-trihydroxycyclohexane-1-carboxylic acid (Chlorogenic acid)                                             |                       | 372.13 | 372.13 | 181; 163; 145; 135; 117; 89                                                                 | 0.7 | Positive | Carboxylic acids and derivatives | Cinnamic acids and derivatives |
| beta-D-Glucopyranoside, 2-(1,3-benzodioxol-5-yl)-3-hydroxypropyl                                                                                                          |                       | 381.07 | 381.12 |                                                                                             | 0.7 | Positive | Benzene and substituted          | Organooxygen compounds         |

|                                                                                                                                                                                           |                   |        |        |                                                   |     |          |                                           |                                              |
|-------------------------------------------------------------------------------------------------------------------------------------------------------------------------------------------|-------------------|--------|--------|---------------------------------------------------|-----|----------|-------------------------------------------|----------------------------------------------|
|                                                                                                                                                                                           |                   |        |        |                                                   |     |          | derivatives                               |                                              |
| Isovitexin                                                                                                                                                                                | IVT               | 431.10 | 431.10 | 311                                               | 0.7 | Positive | Lipids                                    | Flavonoids                                   |
| Isoorientin                                                                                                                                                                               | ISOO              | 449.11 | 449.11 | 431; 413; 395;<br>385; 367; 329;<br>311; 299      | 0.7 | Positive | Lipids                                    | Flavonoids                                   |
| Luteolin-6-C-glucoside (Isoorientin)                                                                                                                                                      | ISOO              | 449.12 | 449.11 | 431; 413; 395;<br>383; 353; 329;<br>299           | 0.7 | Positive | Carboxylic acids<br>and derivatives       | Flavonoids                                   |
| (3R,5R)-3,5-bis[[ <i>(E)</i> -3-(3,4-dihydroxyphenyl)prop-2-enoyl]oxy]-1,4-dihydroxycyclohexane-1-carboxylic acid (3,5-Dicaffeoylquinic acid)                                             | 3,5-diCQA         | 499.12 | 499.12 | 181; 163; 145;<br>135; 117; 89                    | 0.7 | Positive | Carboxylic acids<br>and derivatives       | Cinnamic acids and<br>derivatives            |
| Flavone base + 4O, C-Hex-dHex                                                                                                                                                             |                   | 595.16 | 595.17 | 577; 449; 431;<br>413; 395; 367;<br>339; 329; 299 | 0.7 | Positive | Flavonoid<br>glycosides                   | Flavonoids                                   |
| 4-Hydroxy-6-Methylpyran-2-One                                                                                                                                                             |                   | 127.00 | 127.04 | 99; 87; 71                                        | 0.7 | Negative | Carboxylic acids<br>and derivatives       | Pyrans                                       |
| Indoxyl Sulfate                                                                                                                                                                           |                   | 134.03 | 134.06 | 106                                               | 0.7 | Negative | Imidazopyrimidi-<br>nes                   | Organic sulfuric<br>acids and<br>derivatives |
| Phenylacetic acid                                                                                                                                                                         |                   | 135.04 | 135.04 | 107; 93                                           | 0.7 | Negative | Benzene and<br>substituted<br>derivatives | Benzene and<br>substituted<br>derivatives    |
| (4S,5Z,6S)-4-(2-methoxy-2-oxoethyl)-5-[2-[( <i>E</i> )-3-phenylprop-2-enoyl]oxyethylidene]-6-[(2S,3R,4S,5S,6R)-3,4,5-trihydroxy-6-(hydroxymethyl)oxan-2-yl]oxy-4H-pyran-3-carboxylic acid |                   | 149.01 | 149.06 | 122                                               | 0.7 | Negative | Phenols                                   | Organooxygen<br>compounds                    |
| Daphnetin                                                                                                                                                                                 | Daph              | 179.03 | 179.03 | 161; 135                                          | 0.7 | Negative | Coumarins and<br>derivatives              | Coumarins and<br>derivatives                 |
| D-(-)-Quinic acid                                                                                                                                                                         | QA                | 191.05 | 191.06 | 85                                                | 0.7 | Negative | Benzene and<br>substituted<br>derivatives | Organooxygen<br>compounds                    |
| 7-Methoxy-4-methylcoumarin                                                                                                                                                                | 4-Methylherniarin | 191.05 | 191.07 | 135                                               | 0.7 | Negative | Benzene and                               | Coumarins and                                |

|                                                                                  |                       |        |        |                         |     |          |                                     |                                     |
|----------------------------------------------------------------------------------|-----------------------|--------|--------|-------------------------|-----|----------|-------------------------------------|-------------------------------------|
|                                                                                  |                       |        |        |                         |     |          | substituted derivatives             | derivatives                         |
| trans-3-Hydroxycotinine                                                          | THOC                  | 193.05 | 193.10 | 175; 149; 134           | 0.7 | Negative | Carboxylic acids and derivatives    | Pyridines and derivatives           |
| 6-Hydroxy-7,7-dimethyl-7,8-dihydroimidazo[1,2-a][1,3,5]triazine-2,4(3H,6H)-dione | Terbutylazine-TP      | 197.12 | 197.07 | 169; 154; 127; 111; 85  | 0.7 | Negative | Carboxylic acids and derivatives    | Diazines                            |
| 3-Isobutylhexahydropyrrolo[1,2-a]pyrazine-1,4-dione                              | Cyclo(L-Leu-L-Pro)    | 211.13 | 211.15 | 195                     | 0.7 | Negative | Amino acids, peptides and analogues | Carboxylic acids and derivatives    |
| (7R,8R)-7,8-dihydroxy-3,5,7-trimethyl-8H-isochromen-6-one                        |                       | 245.04 | 245.08 | 227; 185; 153           | 0.7 | Negative | Benzene and substituted derivatives | Organonitrogen compounds            |
| Chrysin                                                                          |                       | 253.09 | 253.05 |                         | 0.7 | Negative | Flavonoids                          | Flavonoids                          |
| Linolenic acid                                                                   | LA                    | 277.22 | 277.24 | 233                     | 0.7 | Negative | Fatty Acyls                         | Fatty Acyls                         |
| 5-(2-Methyl-3-(pyridin-3-yl)-1H-indol-1-yl)pentanoic acid                        |                       | 309.20 | 309.16 | 291; 273; 263; 247; 223 | 0.7 | Negative | Indoles and derivatives             | Benzene and substituted derivatives |
| Phenylbutazone                                                                   | PBZ                   | 309.20 | 309.16 | 211                     | 0.7 | Negative | Organooxygen compounds              | Benzene and substituted derivatives |
| Hydroquinidine                                                                   | HQ                    | 327.21 | 327.21 | 307                     | 0.7 | Negative | Arylsulfates                        | Alkaloids                           |
| 4',5,7-trihydroxy-3,6-dimethoxyflavone                                           | 3,6-Dimethoxyapigenin | 329.07 | 329.07 | 314; 299; 271           | 0.7 | Negative | Carboxylic acids and derivatives    | Flavonoids                          |
| Chlorogenoquinone                                                                |                       | 351.07 | 351.07 | 191; 179; 161; 135      | 0.7 | Negative | Benzene and substituted derivatives | Organooxygen compounds              |
| 1,7-bis(4-hydroxyphenyl)-5-methoxyheptan-3-one                                   | Platyphylline         | 351.20 | 351.16 | 289; 107                | 0.7 | Negative | Flavonoids                          | Organooxygen compounds              |
| Caffeoylquinic acid                                                              | CQA                   | 353.08 | 353.09 | 191; 179; 173; 161; 135 | 0.7 | Negative | Flavonoids                          | Cinnamic acids and derivatives      |
| Chlorogenic Acid                                                                 | CGA                   | 354.28 | 354.31 | 191; 179; 173           | 0.7 | Negative | Flavonoids                          | Cinnamic acids and derivatives      |
| Feruloylquinic acid                                                              | FQA                   | 367.10 | 367.10 | 193; 173; 149; 134      | 0.7 | Negative | Steroids and                        | Cinnamic acids and derivatives      |

|                                                                                                                                                                        |                  |        |        |                    |     |          |                                  |                        |
|------------------------------------------------------------------------------------------------------------------------------------------------------------------------|------------------|--------|--------|--------------------|-----|----------|----------------------------------|------------------------|
|                                                                                                                                                                        |                  |        |        |                    |     |          | steroid derivatives              |                        |
| (1S,4aS,7aS)-1-(beta-D-Glucopyranosyloxy)-7-(hydroxymethyl)-1,4a,5,7a-tetrahydrocyclopenta[c]pyran-4-carboxylic acid                                                   | Geniposidic acid | 397.13 | 397.11 | 235                | 0.7 | Negative | Carboxylic acids and derivatives | Organooxygen compounds |
| 2H-Naphtho[2,1-c]pyran-7-carboxylic acid, 2-(3-furanyl)-1,4,4a,5,6,6a,7,10,10a,10b-decahydro-7-hydroxy-6a,10b-dimethyl-4-oxo-, methyl ester, (2S,4aS,6aR,7R,10aR,10bR) |                  | 397.13 | 397.16 |                    | 0.7 | Negative | Carboxylic acids and derivatives | Organic compounds      |
| Hexose + C13H17O3                                                                                                                                                      | Corchoionoside B | 399.16 | 399.17 | 219; 175; 160      | 0.7 | Negative | Organooxygen compounds           | Organooxygen compounds |
| Methyl 3,5-dimethoxy-2-[5-methoxy-4-oxo-6-[(E)-prop-1-enyl]pyran-3-carbonyl]benzoate                                                                                   | Methylfunicone   | 411.07 | 411.11 |                    | 0.7 | Negative | Flavonoids                       | Pyrans                 |
| Naftopidil                                                                                                                                                             | NAF              | 415.16 | 415.20 |                    | 0.7 | Negative | Benzoxepines                     | Diazinanes             |
| beta-D-Glucopyranoside, 2-phenylethyl 2-O-beta-D-xylopyranosyl-                                                                                                        |                  | 439.11 | 439.16 | 307                | 0.7 | Negative | Carboxylic acids and derivatives | Organooxygen compounds |
| 11,15-Diene-14-carboxylic acid, 3,15,19-trihydroxy-4,4,8,12,16-pentamethyl-17-oxo-, methyl ester                                                                       |                  | 445.23 | 445.26 |                    | 0.7 | Negative | Organooxygen compounds           | Glycerolipids          |
| Luteolin-6-C-glucoside                                                                                                                                                 |                  | 447.08 | 447.09 | 429; 357; 327      | 0.7 | Negative | Carboxylic acids and derivatives | Flavonoids             |
| Quercetin-3-O-galactoside                                                                                                                                              | Hyperoside       | 463.09 | 463.09 | 301                | 0.7 | Negative | Flavonoids                       | Flavonoids             |
| Emetine                                                                                                                                                                |                  | 481.27 | 481.31 |                    | 0.7 | Negative | Lipids                           | Alkaloids              |
| PG(16:1/0:0)                                                                                                                                                           |                  | 482.27 | 482.26 |                    | 0.7 | Negative | Lipids                           | Glycerophospholipids   |
| MGMG 18:3                                                                                                                                                              |                  | 513.31 | 513.30 | 513; 277; 253; 235 | 0.7 | Negative | Organooxygen compounds           | Glycerolipids          |
| beta-D-Glucopyranoside, 2-methoxy-4-[tetrahydro-3a,6a-dihydroxy-4-(4-hydroxy-3-methoxyphenyl)-1H,3H-                                                                   |                  | 575.14 | 575.17 |                    | 0.7 | Negative | Lipids                           | Furanoid lignans       |

|                                                                                                                  |                            |        |        |                         |     |          |                                      |               |
|------------------------------------------------------------------------------------------------------------------|----------------------------|--------|--------|-------------------------|-----|----------|--------------------------------------|---------------|
| furo[3,4-c]furan-1-yl]phenyl                                                                                     |                            |        |        |                         |     |          |                                      |               |
| 2-(3,4-dihydroxyphenyl)-5-hydroxy-3,7-bis[[(2S,3R,4R,5R,6S)-3,4,5-trihydroxy-6-methyloxan-2-yl]oxy]chromen-4-one | Quercetin 3,7-dirhamnoside | 593.16 | 593.15 | 447                     | 0.7 | Negative | Flavonoids                           | Flavonoids    |
| DGMG 18:3                                                                                                        |                            | 721.35 | 721.36 | 675; 415; 397; 287; 112 | 0.7 | Negative | Organooxygen compounds               | Glycerolipids |
| Smiglaside C + 1Acetyl                                                                                           |                            | 861.25 | 861.25 |                         | 0.7 | Negative | Hexacarboxylic acids and derivatives | Glycerolipids |

**Table S2.** Metabolites manually annotated based on searching the calculated molecular formulas against the DNP, Chempider, SorgCyc, PlantCyc and KEGG databases, confirming the metabolite structure by inspecting the fragmentation pattern, and comparison with annotated metabolites in published literature, particularly in (Kang et al., 2016).

| Metabolite Annotation        | Metabolite Abbreviation       | RT (min.) | Precursor mass ( <i>m/z</i> ) | Diagnostic fragments ( <i>m/z</i> ) | Ionisation Mode | ClassyFire Class Annotation         | Manually assigned Chemical Class Terms |
|------------------------------|-------------------------------|-----------|-------------------------------|-------------------------------------|-----------------|-------------------------------------|----------------------------------------|
| Galloyl-hexose               | Glucogallin                   | 1.68      | 331.063                       | 168; 125                            | Negative        | Benzene and substituted derivatives | Tannins                                |
| Isocitric acid               |                               | 1.85      | 191.017                       | 173; 129; 111; 85                   | Negative        | Benzene and substituted derivatives | Carboxylic acids and derivatives       |
| Caffeoyl-glucaric acid       | Caffeoylglucarate             | 1.85      | 371.057                       | 209; 191; 179                       | Negative        | Benzene and substituted derivatives | Carboxylic acids and derivatives       |
| Hydroxycitric acid           | HCA                           | 2.20      | 207.012                       | 191; 189; 127                       | Negative        | Benzene and substituted derivatives | Carboxylic acids and derivatives       |
| DIBOA-glucoside              |                               | 2.29      | 342.081                       | 180; 153                            | Negative        | Benzene and substituted derivatives | Organooxygen compounds                 |
| 5-Coumaroylquinic acid       | 5-CoQA                        | 3.36      | 337.086                       | 191; 163                            | Negative        | Organooxygen compounds              | Cinnamic acids and derivatives         |
| Glucosyl-apigenin            | Apigenin 7-O-beta-D-glucoside | 3.53      | 431.153                       | 269                                 | Negative        | Flavonoids                          | Flavonoids                             |
| 5-Caffeoylquinic acid        | 5-CQA                         | 3.65      | 353.084                       | 191                                 | Negative        | Flavonoids                          | Cinnamic acids and derivatives         |
| Sinapoyl-D-glucose           |                               | 4.18      | 385.109                       | 223; 205; 179                       | Negative        | Organooxygen compounds              | Cinnamic acids and derivatives         |
| Clovamide                    |                               | 4.43      | 358.091                       | 222; 178                            | Negative        | Flavonoids                          | Carboxylic acids and derivatives       |
| 1,3-Dicaffeoylquinic acid    | 1,3-diCQA                     | 4.49      | 515.118                       | 353; 191; 179                       | Negative        | Flavonoids                          | Cinnamic acids and derivatives         |
| 2-Feruloylhydroxycitric acid |                               | 4.8       | 383.059                       | 189; 127; 33; 83                    | Negative        | Flavonoids                          | Carboxylic acids and derivatives       |
| 3-Feruloylquinic acid        | 3-FQA                         | 4.83      | 367.099                       | 193; 173; 134                       | Negative        | Steroids and steroid derivatives    | Cinnamic acids and derivatives         |
| Isoschaftoside               |                               | 4.92      | 563.138                       | 473; 443; 413; 383; 353             | Negative        | Carboxylic acids and derivatives    | Flavonoids                             |

|                                                                  |                      |       |         |                              |          |                                     |                                |
|------------------------------------------------------------------|----------------------|-------|---------|------------------------------|----------|-------------------------------------|--------------------------------|
| Neohesperidin                                                    | NEO                  | 5.23  | 609.146 | 301; 300; 293                | Negative | Benzene and substituted derivatives | Flavonoids                     |
| Rutin (Quercetin- <i>O</i> -hexoside- <i>O</i> -rhamnoside)      | RUT                  | 5.54  | 609.146 | 301; 300; 271; 255           | Negative | Flavonoids                          | Flavonoids                     |
| Tricin- <i>O</i> -(5/7/4')hexoside- <i>O</i> -(5/7/4')rhamnoside |                      | 5.94  | 637.247 | 439; 399; 329                | Negative | Organooxygen compounds              | Flavonoids                     |
| Kaempferol-7- <i>O</i> -hexoside                                 |                      | 6.27  | 447.088 | 285; 284; 255                | Negative | Flavonoids                          | Flavonoids                     |
| Apigenin- <i>C</i> -hexoside- <i>C</i> -rhamnoside               |                      | 6.33  | 577.152 | 473; 437; 413; 357; 327; 298 | Negative | Flavonoids                          | Flavonoids                     |
| Maysin                                                           | Mys                  | 6.74  | 575.139 | 473; 411; 337; 298; 285      | Negative | Lipids                              | Flavonoids                     |
| Diosmetin-7- <i>O</i> -rutinoside                                |                      | 7.33  | 607.163 | 299; 284                     | Negative | Lipids                              | Flavonoids                     |
| Dihydroxy-dodecadienoic acid                                     |                      | 9.34  | 227.127 | 183; 165; 160                | Negative | Organooxygen compounds              | Fatty Acyls                    |
| Alpha-D-glucopyranosyl-nonadecandiol                             |                      | 13.24 | 577.266 | 299; 225                     | Negative | Lipids                              | Glycerolipids                  |
| Palmitoylglycerol-phosphate                                      |                      | 14.33 | 431.216 | 295; 277; 195; 152           | Negative | Lipids                              | Glycerophospholipids           |
| Isoleucine                                                       | Ile                  | 1.37  | 132.107 | 86                           | Positive | Carboxylic acids and derivatives    | Amino acids and derivatives    |
| Phenylalanine                                                    | Phe                  | 1.90  | 166.089 | 120; 103                     | Positive | Carboxylic acids and derivatives    | Amino acids and derivatives    |
| Tryptophan                                                       | Trp                  | 2.84  | 205.100 | 188                          | Positive | Carboxylic acids and derivatives    | Amino acids and derivatives    |
| 7-Hydroxycoumarin                                                | Umbelliferone        | 3.23  | 163.045 |                              | Positive | Coumarins and derivatives           | Coumarins and derivatives      |
| Coumarin                                                         |                      | 4.02  | 147.044 | 91                           | Positive | Coumarins and derivatives           | Coumarins and derivatives      |
| Ascorbic acid                                                    | ASC                  | 4.32  | 177.057 | 145                          | Positive | Carboxylic acids and derivatives    | Dihydrofurans                  |
| DIMBOA                                                           |                      | 4.43  | 212.060 | 193; 177; 166                | Positive | Benzene and substituted derivatives | Organooxygen compounds         |
| Dimethoxycinnamic acid                                           | Dimethylcaffeic acid | 5.26  | 209.158 | 177; 163; 149                | Positive | Carboxylic acids and derivatives    | Cinnamic acids and derivatives |
| Kaempferol-3-rutinoside                                          |                      | 7.11  | 594.188 | 577; 449; 432;               | Positive | Flavonoids                          | Flavonoids                     |

|  |  |  |  |          |  |  |  |
|--|--|--|--|----------|--|--|--|
|  |  |  |  | 413; 287 |  |  |  |
|--|--|--|--|----------|--|--|--|

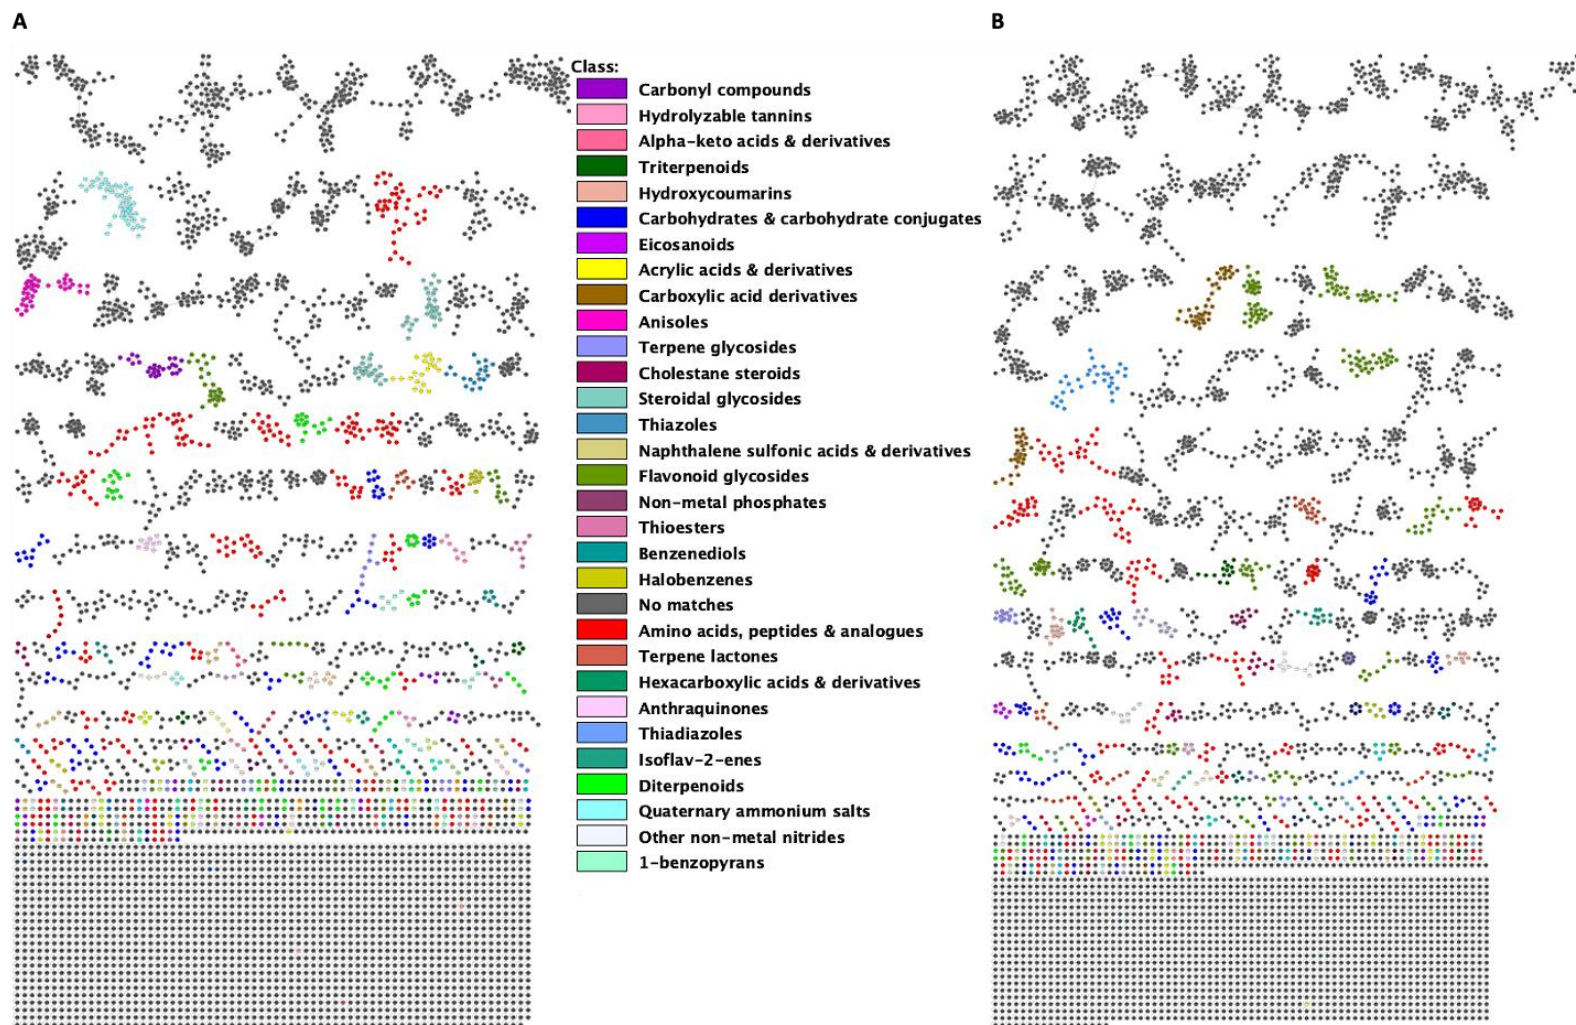

**Figure S3.** MolNetEnhancer enriched feature-based molecular networks of (A) positive electrospray ionisation (ESI<sup>+</sup>) and (B) negative electrospray ionisation (ESI<sup>-</sup>) MS/MS spectra obtained from maize leave extracts. The MolNetEnhancer enriched molecular networks depict structurally similar nodes as molecular families/clusters. GNPS spectral library matched annotations and *in silico* NAP annotations were used to predict chemical compound subclass annotations, represented by coloured nodes (ClassyFire subclass ontology terms) with nodes without subclass annotation coloured grey.

**Table S3.** Discriminating features (*m/z* ions) selected using OPLS-DA modelling. The features were selected from OPLS-DA loading S-plots, and based on descriptive statistics, these features have a *p*-value < 0.05, the fold changes describe the differential changes between treatment groups. These include (i) normal well-watered conditions, T1 vs T3 = control group vs soil applied biostimulant; T1 vs T5 = control vs foliar applied biostimulant; (ii) under drought stress conditions, T2 vs T4 = control vs soil applied biostimulant; and T2 vs T6 = control vs foliar applied biostimulant.

|    | Metabolite Annotation                                                              | Precursor mass<br>( <i>m/z</i> ) | Ionisation/ESI mode | Fold change |          |          |          |
|----|------------------------------------------------------------------------------------|----------------------------------|---------------------|-------------|----------|----------|----------|
|    |                                                                                    |                                  |                     | T1 vs T3    | T1 vs T5 | T2 vs T4 | T2 vs T6 |
| 1  | Chlorogenic acid                                                                   | 372.13                           | Positive            | 10.4944     | 13.2289  | --       | 2.50993  |
| 2  | Caffeic acid                                                                       | 181.06                           | Positive            | 12.129      | 11.8128  | 12.8248  | --       |
| 3  | 3-p-Coumaroylquinic acid                                                           | 339.11                           | Positive            | 6.53507     | 4.84211  | --       |          |
| 4  | 4-O-Feruloyl-D-quinic acid                                                         | 369.12                           | Positive            | 3.18574     | 3.20065  | --       | 1.87538  |
| 5  | Isoorientin                                                                        | 449.11                           | Positive            |             | 2.97742  | --       | 2.10284  |
| 6  | 4-[(E)-3-(3,4-dihydroxyphenyl)prop-2-enoyl]oxy-2,3-dihydroxy-2-methylbutanoic acid | 330.12                           | Positive            | 3.14916     | 2.78827  | --       | --       |
| 7  | Isoleucine                                                                         | 132.107                          | Positive            | 3.61817     | 2.72072  | 2.21818  | 2.04309  |
| 8  | 3-Nitro-L-tyrosine                                                                 | 225.04                           | Positive            | 0.7611      | 2.5475   | 2.23178  | 4.04064  |
| 9  | 4-Coumaric acid                                                                    | 165.06                           | Positive            | 2.24436     | 2.42359  | --       | 1.87526  |
| 10 | DIMBOA                                                                             | 212.060                          | Positive            | 3.0041      | 2.19735  | --       | --       |
| 11 | Rosmarinic acid                                                                    | 361.14                           | Positive            |             | 2.13027  | 2.04633  | 2.06454  |
| 12 | Isoferulic acid                                                                    | 195.07                           | Positive            | 1.58899     | 1.91499  | 1.68017  | 1.7849   |
| 13 | Oleamide                                                                           | 282.28                           | Positive            | 1.27436     | 1.845    | --       | 0.65125  |
| 14 | Caffeoylquinic acid                                                                | 355.10                           | Positive            | 1.48372     | 1.8049   | --       | 1.38004  |
| 15 | 3,5-Dicaffeoylquinic acid                                                          | 499.12                           | Positive            | 0.792413    | 1.61802  | 1.65862  | --       |
| 16 | Flavone base + 4O, C-Hex-dHex                                                      | 595.16                           | Positive            | --          | 1.54967  | 1.5001   | --       |
| 17 | Tryptophan                                                                         | 205.100                          | Positive            | 1.54858     | 1.5408   | 1.81519  | 1.51303  |
| 18 | Rosmarinic acid                                                                    | 163.04                           | Positive            | 1.44044     | 1.46159  | --       | --       |
| 19 | Chlorogenic acid                                                                   | 337.09                           | Positive            | 0.71981     | 1.37207  | 1.39695  | --       |
| 20 | Phenylalanine                                                                      | 166.089                          | Positive            | 1.62253     | 1.23116  | --       | --       |
| 21 | Coumarin                                                                           | 147.044                          | Positive            | 1.25865     | 1.15174  | 0.697786 | 0.801883 |
| 22 | Ascorbic acid                                                                      | 177.057                          | Positive            | 1.19515     | 1.11454  | ---      | 0.829177 |
| 23 | Monolinolenin                                                                      | 353.27                           | Positive            | 1.11524     | 1.09418  | 1.49741  | 1.48348  |
| 24 | 1-Naphthol                                                                         | 145.03                           | Positive            | 0.840155    | 0.850788 | 0.808124 | 0.750667 |
| 25 | Pinolenic acid                                                                     | 261.22                           | Positive            | --          | 0.850328 | 1.46484  | 1.3202   |
| 26 | 2-Naphthol                                                                         | 145.03                           | Positive            | --          | 0.828374 | 0.818342 | 0.843147 |
| 27 | (4S,5Z,6S)-4-(2-methoxy-2-oxoethyl)-5-[2-[(E)-3-phenylprop-2-enoyl]oxyethylidene]- | 149.03                           | Positive            | --          | 0.82761  | 0.67943  | 0.634595 |

|    |                                                                                                |          |          |          |          |          |          |
|----|------------------------------------------------------------------------------------------------|----------|----------|----------|----------|----------|----------|
|    | 6-[(2S,3R,4S,5S,6R)-3,4,5-trihydroxy-6-(hydroxymethyl)oxan-2-yl]oxy-4H-pyran-3-carboxylic acid |          |          |          |          |          |          |
| 28 | beta-D-Glucopyranoside, 2-(1,3-benzodioxol-5-yl)-3-hydroxypropyl                               | 381.07   | Positive | --       | 0.753659 | --       | --       |
| 29 | 9-HOTrE                                                                                        | 293.21   | Positive |          | 0.744466 | --       | 2.14705  |
| 30 | 3,6-Dimethoxyapigenin                                                                          | 331.07   | Positive | 0.628963 | 0.740743 | 0.740934 | 0.764076 |
| 31 | Isovitexin                                                                                     | 431.10   | Positive | --       | 0.688611 | --       | 0.592188 |
| 32 | 4,4'-Methylenebis(2,6-diethylaniline)                                                          | 311.25   | Positive | 0.710754 | 0.647564 | --       | --       |
| 33 | Adenine                                                                                        | 136.06   | Positive | 0.729843 | 0.574953 | 0.673037 | 0.594337 |
| 34 | Mosloflavone                                                                                   | 299.06   | Positive |          | 0.361895 | 0.509342 | 0.630973 |
| 35 | Phenethylamine                                                                                 | 122.10   | Positive | 0.199693 | 0.130627 | --       | --       |
| 36 | Unknown                                                                                        | 609.2    | Positive | 39.3651  | 115.624  | --       | 0.251585 |
| 37 | Unknown                                                                                        | 663.1975 | Positive | 28.409   | 93.8611  | 5.05567  | 14.612   |
| 38 | Unknown                                                                                        | 361.2    | Positive | ---      | 42.9979  | --       | 7.22383  |
| 39 | Unknown                                                                                        | 372.2    | Positive | ---      | 42.0263  | --       | --       |
| 40 | Unknown                                                                                        | 597.2379 | Positive | 13.375   | 30.0117  | 4.25424  | 17.9952  |
| 41 | Unknown                                                                                        | 480.1792 | Positive | --       | 19.5221  | --       | --       |
| 42 | Unknown                                                                                        | 333.2    | Positive | 9.2414   | 14.6326  | ---      | --       |
| 43 | Unknown                                                                                        | 529.2566 | Positive |          | 130.471  | ---      | 7.12296  |
| 44 | Unknown                                                                                        | 701.4    | Positive | 11.8758  | 13.5887  | 6.05054  | 11.617   |
| 45 | Unknown                                                                                        | 595.2    | Positive |          | 13.5452  | 15.0596  | 44.0796  |
| 46 | Unknown                                                                                        | 469.2    | Positive | 11.4584  | 12.8629  | 8.44296  | 5.64191  |
| 47 | Unknown                                                                                        | 969.3854 | Positive | 5.57716  | 12.3445  | --       | 0.505624 |
| 48 | Unknown                                                                                        | 659.2221 | Positive | 3.41814  | 12.291   | 3.70946  | 13.4256  |
| 49 | Unknown                                                                                        | 683.1    | Positive | 6.78151  | 11.5184  | 2.60385  | --       |
| 50 | Unknown                                                                                        | 621.2    | Positive | 14.2503  | 11.133   | --       | 2.05054  |
| 51 | Unknown                                                                                        | 669.2    | Positive | 4.70576  | 10.7753  |          | --       |
| 52 | Unknown                                                                                        | 489.2    | Positive | 181.667  | 10.467   | --       | ---      |
| 53 | Unknown                                                                                        | 558.099  | Positive | 0.131532 | 8.53154  | ---      | ---      |
| 54 | Unknown                                                                                        | 458.3238 | Positive | --       | 8.46583  | 2.27218  | 3.68438  |
| 55 | Unknown                                                                                        | 373.2232 | Positive | 8.81935  | 8.23571  | --       | ---      |
| 56 | Unknown                                                                                        | 275.2063 | Positive | --       | 8.1932   | --       | 3.12261  |
| 57 | Unknown                                                                                        | 401.1581 | Positive | 4.19974  | 7.81104  | --       | --       |
| 58 | Unknown                                                                                        | 316.2179 | Positive | 7.06704  | 7.48433  | 4.87977  | 2.17392  |
| 59 | Unknown                                                                                        | 355.1523 | Positive | 17.7554  | 7.47921  | --       | ---      |
| 60 | Unknown                                                                                        | 387.1369 | Positive | --       | 6.21781  | ---      | 6.72439  |

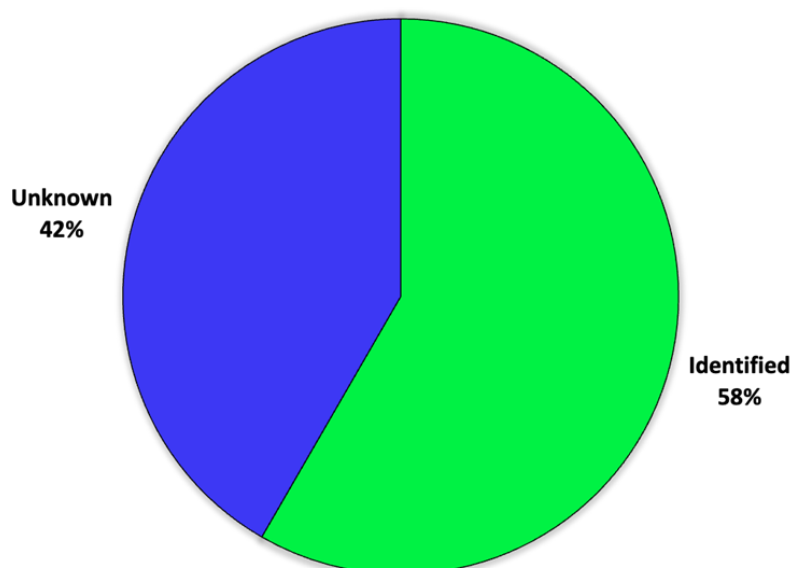

**Figure S4.** A pie chart of selected differential metabolite features, depicting the percentage of annotated metabolites using the MN approach.

**Table S4.** Significantly altered metabolic pathways in seaweed-based biostimulant treated maize plants under normal and drought stress conditions, with their metabolite hits/matches, calculated p-value (Raw p), Holm-Bonferroni method adjusted p-value (Holm adjust) and pathway topology analysis calculated impact value.

| Pathway                                                | Hits | Raw p      | Holm adjust | Impact  |
|--------------------------------------------------------|------|------------|-------------|---------|
| Phenylalanine metabolism                               | 2    | 8.0606e-10 | 1.5315e-08  | 0.61539 |
| Stilbenoid, diarylheptanoid and gingerol biosynthesis  | 2    | 0.0083225  | 0.049935    | 0.25    |
| alpha-Linolenic acid metabolism                        | 1    | 0.080037   | 0.40019     | 0.11368 |
| Phenylpropanoid biosynthesis                           | 7    | 3.8338e-05 | 0.00057506  | 0.17468 |
| Glyoxylate and dicarboxylate metabolism                | 1    | 0.58756    | 1           | 0.10393 |
| Arginine and proline metabolism                        | 1    | 0.0018983  | 0.017085    | 0.06649 |
| Citrate cycle (TCA cycle)                              | 1    | 0.58756    | 1           | 0.04508 |
| Flavonoid biosynthesis                                 | 4    | 0.0069413  | 0.048589    | 0.05138 |
| Phenylalanine, tyrosine and tryptophan biosynthesis    | 1    | 1.9623e-11 | 4.1209e-10  | 0.0015  |
| Ubiquinone and other terpenoid-quinone biosynthesis    | 1    | 0.00033935 | 0.0040721   | 0.00102 |
| Tropane, piperidine and pyridine alkaloid biosynthesis | 1    | 1.9623e-11 | 4.1209e-10  | 0       |
| Purine metabolism                                      | 1    | 2.6986e-08 | 4.8574e-07  | 0       |
| Zeatin biosynthesis                                    | 1    | 2.6986e-08 | 4.8574e-07  | 0       |
| Aminoacyl-tRNA biosynthesis                            | 2    | 9.3596e-07 | 1.4975e-05  | 0       |
| Valine, leucine and isoleucine degradation             | 1    | 5.8524e-05 | 0.00081933  | 0       |
| Valine, leucine and isoleucine biosynthesis            | 1    | 5.8524e-05 | 0.00081933  | 0       |
| Ascorbate and aldarate metabolism                      | 1    | 0.00062287 | 0.0062287   | 0       |
| Arachidonic acid metabolism                            | 1    | 0.0043129  | 0.034503    | 0       |
| Biosynthesis of unsaturated fatty acids                | 1    | 0.080037   | 0.40019     | 0       |
| Flavone and flavonol biosynthesis                      | 4    | 0.17864    | 0.53592     | 0       |

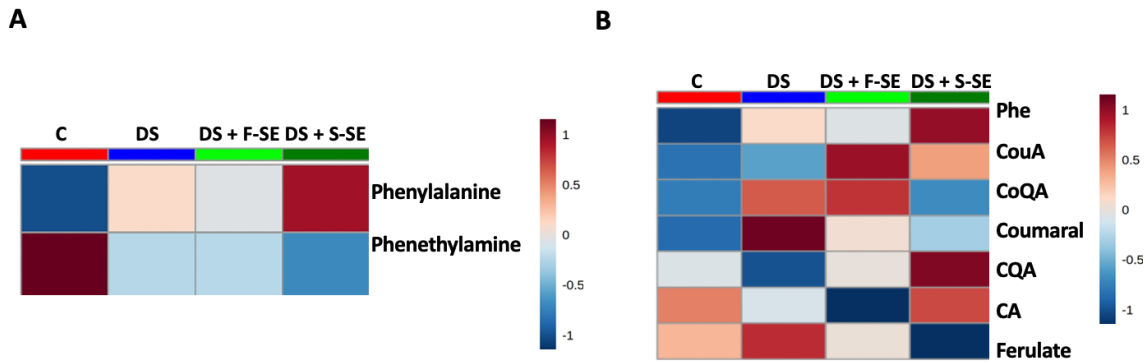

**Figure S5.** Heatmaps displaying differential qualitative alterations in the concentrations of some of the (A) phenylalanine metabolism and (B) phenylpropanoid biosynthesis pathway metabolites **Abbreviation:** C, Control (no stress; no seaweed extract biostimulant); DS, Drought stress (stress; no seaweed extract biostimulant); DS + F-SE, Drought stress with foliar applied seaweed extract biostimulant; DS + S-SE, Drought stress with soil applied seaweed extract biostimulant; Phe, Phenylalanine; CouA, Coumaric acid; CoQa, Coumaroylquinic acid; Coumaral, Coumaraldehyde; CQA, Caffeoylquinic acid; CA, Caffeic acid.

**Table S5.** Height (cm) of maize plants with and without seaweed-based biostimulant treatment under normal and drought stress conditions, with the calculated p-value, 95% probability level (Fisher's LSD test) and cross-validation percentage (CV%). Measurements indicate the effect of the seaweed-based biostimulant treatment on the maize plant's height under normal and drought stress conditions.

| Treatment Description                         | 1 Day after treatment | 3 Days after treatment | 7 Days after treatment | 14 Days after treatment |
|-----------------------------------------------|-----------------------|------------------------|------------------------|-------------------------|
| Control (No seaweed extract, no stress)       | 13.66                 | 14.54                  | 15.80 a                | 21.34 c                 |
| Control (No seaweed extract with stress)      | 13.70                 | 14.28                  | 16.46 ab               | 16.83 a                 |
| Soil applied seaweed extract with no stress   | 14.56                 | 14.58                  | 17.74 b                | 23.02 d                 |
| Soil applied seaweed extract with stress      | 14.36                 | 14.30                  | 15.94 a                | 16.82 a                 |
| Foliar applied seaweed extract with no stress | 14.26                 | 14.82                  | 15.86 a                | 21.79 cd                |
| Foliar applied seaweed extract with stress    | 14.58                 | 14.16                  | 15.74 a                | 18.15 b                 |
| <b>Descriptive statistics</b>                 |                       |                        |                        |                         |
| Total n                                       | 30                    | 30                     | 30                     | 30                      |
| Mean                                          | 14.19                 | 14.45                  | 16.26                  | 19.66                   |
| Std Dev                                       | 0.9209                | 1.370                  | 1.285                  | 2.669                   |
| p-value                                       | 0.8205                | 0.9441                 | 0.0760                 | 0.0192                  |
| LSD ( $\alpha=0.05$ )                         | 1.203                 | 1.938                  | 1.530                  | 1.239                   |
| CV%                                           | 6.491                 | 9.480                  | 7.902                  | 13.58                   |

Means within a column with the **same letter(s)** are **not significantly** different at the 95% probability level (Fisher's LSD test)

**Table S6.** Diameter of maize plants with and without seaweed-based biostimulant treatment under normal and drought stress conditions, with the calculated p-value and 95% probability level (Fisher's LSD test). Measurements indicate the effect of the seaweed-based biostimulant treatment on the maize plant's diameter under normal and drought stress conditions.

| <b>Treatment Description</b>                  | <b>1 Day after treatment</b> | <b>3 Days after treatment</b> | <b>7 Days after treatment</b> | <b>14 Days after treatment</b> |
|-----------------------------------------------|------------------------------|-------------------------------|-------------------------------|--------------------------------|
| Control (No seaweed extract, no stress)       | 11.65 ab                     | 12.34                         | 12.17 ab                      | 13.67 ab                       |
| Control (No seaweed extract with stress)      | 11.33 a                      | 12.44                         | 12.61 ab                      | 12.78 a                        |
| Soil applied seaweed extract with no stress   | 12.34 b                      | 11.93                         | 13.07 b                       | 14.26 b                        |
| Soil applied seaweed extract with stress      | 11.92 ab                     | 11.83                         | 12.34 ab                      | 12.82 ab                       |
| Foliar applied seaweed extract with no stress | 12.27 ab                     | 11.90                         | 12.49 ab                      | 13.74 ab                       |
| Foliar applied seaweed extract with stress    | 11.39 a                      | 12.11                         | 12.05 a                       | 13.70 ab                       |
| <b>Descriptive statistics</b>                 |                              |                               |                               |                                |
| Total n                                       | 30                           | 30                            | 30                            | 30                             |
| Mean                                          | 11.82                        | 12.09                         | 12.46                         | 13.50                          |
| Std Dev                                       | 0.773                        | 0.806                         | 0.761                         | 1.160                          |
| p-value                                       | 0.6608                       | 0.9175                        | 0.2134                        | 0.3943                         |
| LSD ( $\alpha=0.05$ )                         | 0.946                        | 1.108                         | 0.978                         | 1.474                          |
| CV%                                           | 6.537                        | 6.668                         | 6.111                         | 8.595                          |

Means within a column with the **same letter(s)** are **not significantly** different at the 95% probability level (Fisher's LSD test)
